# Supplementary material
Source: PubMed Central journal article supplement (PMC7270872)
Supplement: jamasurg-155-e200420-s003.pdf [file jamasurg-155-e200420-s003.pdf]

## Data Sharing Statement

Cohen. Effect of Gastric Bypass vs Best Medical Treatment on Early-Stage Chronic Kidney Disease in Patients With Type 2 Diabetes and Obesity. *JAMA Surg*. Published June 03, 2020.  
10.1001/jamasurg.2020.0420

### Data

**Data available:** Yes

**Data types:** Deidentified participant data

**How to access data:** Dr Ricardo Cohen [ricardo.cohen@haoc.com.br](mailto:ricardo.cohen@haoc.com.br)

**When available:** With publication

### Supporting Documents

**Document types:** None

### Additional Information

**Who can access the data:** Researchers whose proposed use of the data has been approved

**Types of analyses:** A specified agreed purpose (secondary analysis)

**Mechanisms of data availability:** After approval of a proposal
